# Supplementary material
Source: publisher figshare collection journal article supplement (https://acs.figshare.com/ndownloader/files/4688500)

Fig S1. TGA trace of **1**.

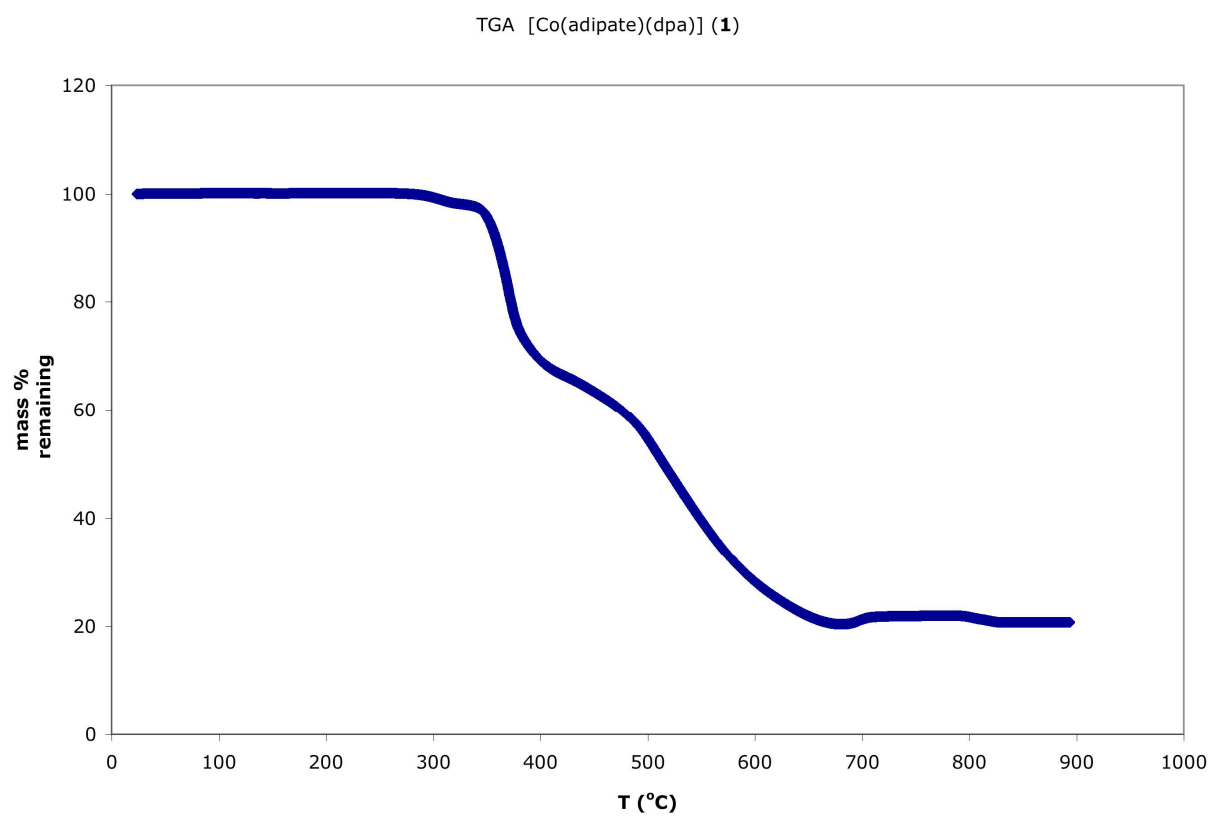

Fig S2. TGA trace of **2**.

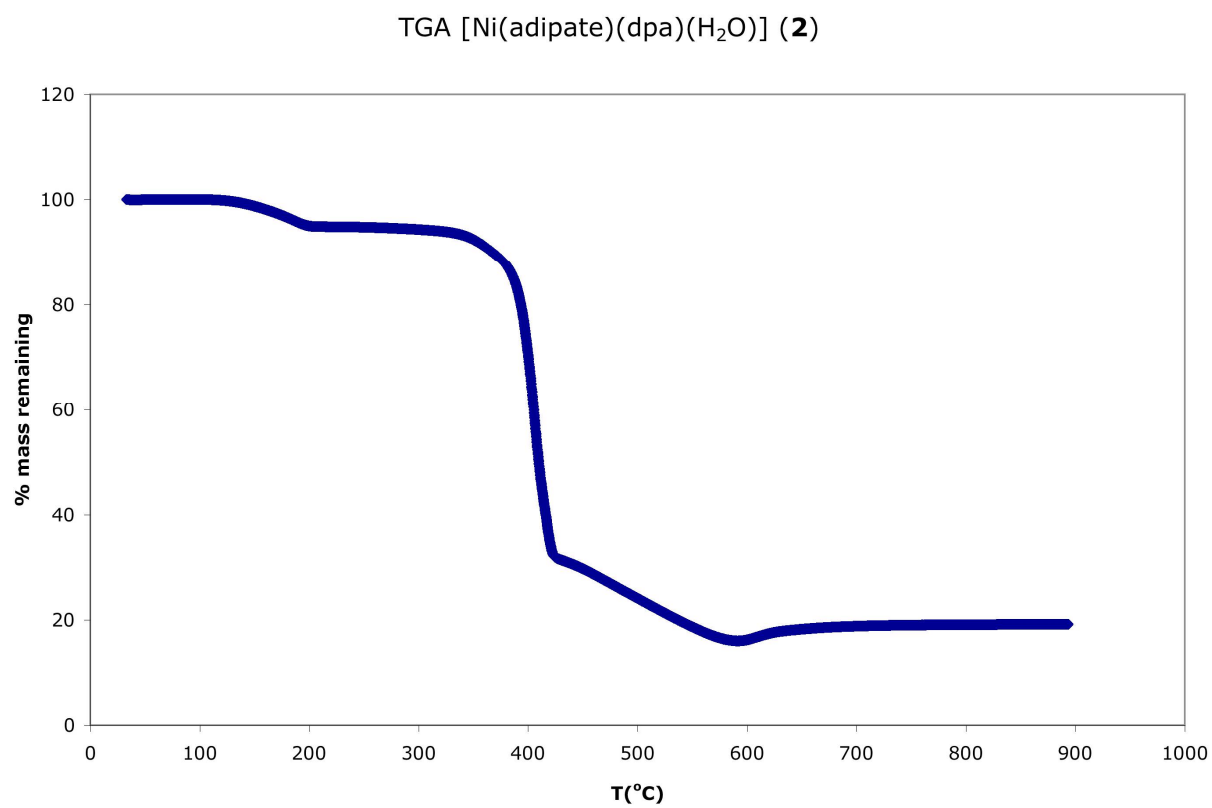

Fig S3. TGA trace of **3**.

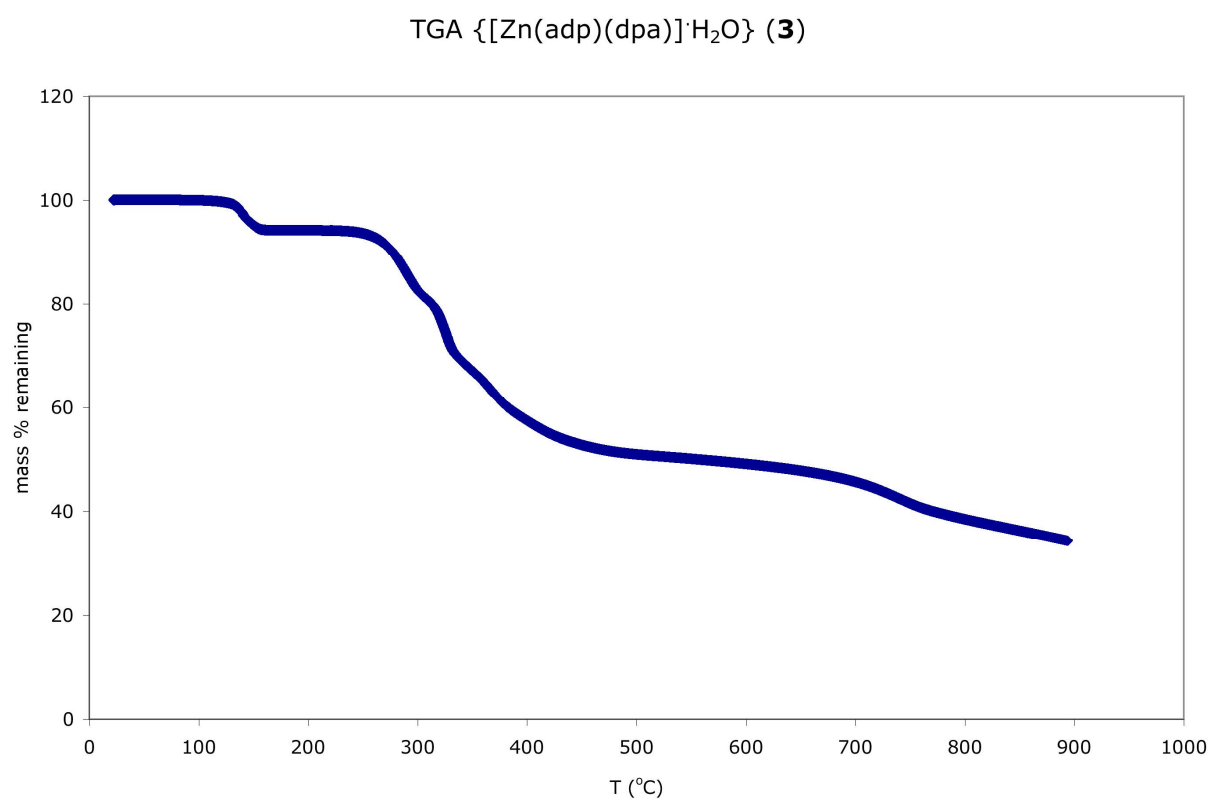

Supplement: Supplementary file 1 [file 4688500]
